# Supplementary material for: Genetic Loci Associated with Resistance to Zucchini Yellow Mosaic Virus in Squash
Source: MDPI journal article supplement (doi:10.3390/plants10091935), 2021-09-17
Supplement: s1 [file s1]

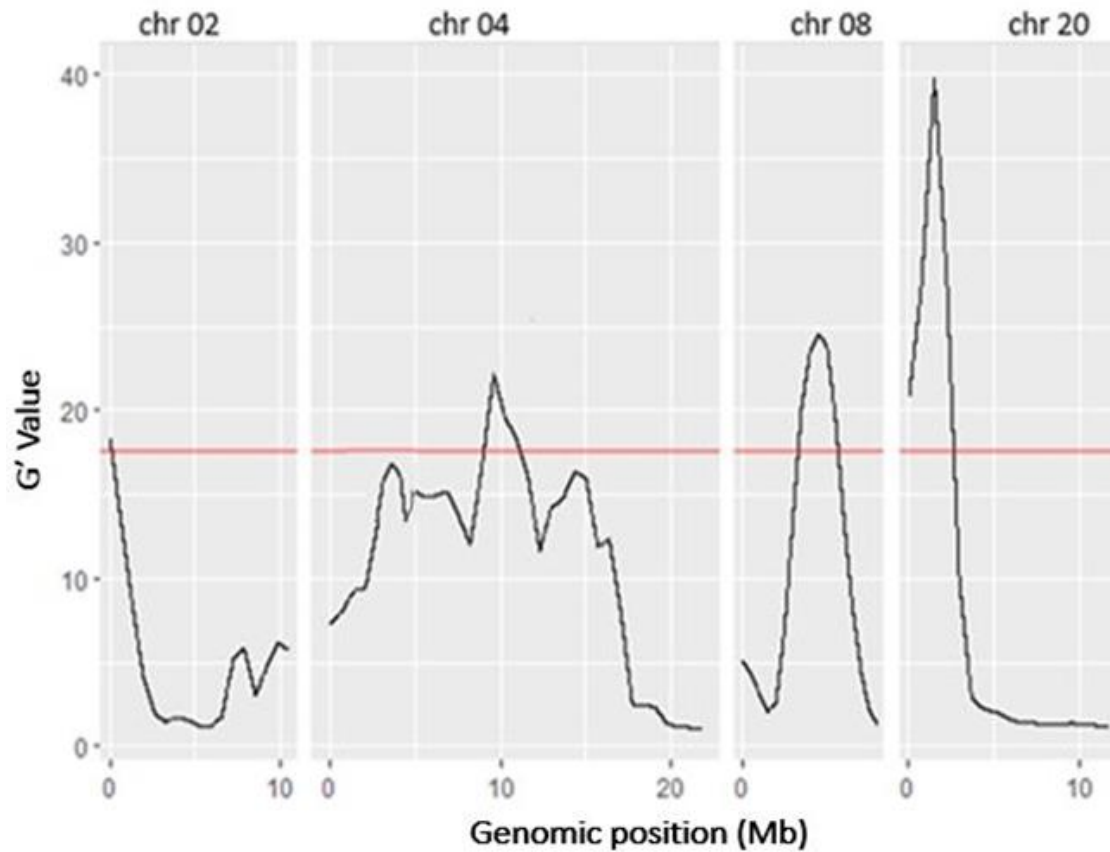

Figure S2: Quantitative trait loci (QTL) associated with ZYMV resistance in *C. moschata* identified on chromosome (chr) 02, 04, 08 and 20 using Butterbush as the parental consensus reference genome. Black line represents tricube smoothed  $G'$  value for each SNP. Red line denotes genome wide false discovery rate (FDR) of 0.01. Peaks above 0.01 FDR line potentially harbor QTLs associated with ZYMV resistance.
