# Supplementary material for: Genetic Loci Associated with Resistance to Zucchini Yellow Mosaic Virus in Squash
Source: MDPI journal article supplement (doi:10.3390/plants10091935), 2021-09-17
Supplement: s1 [file s1]

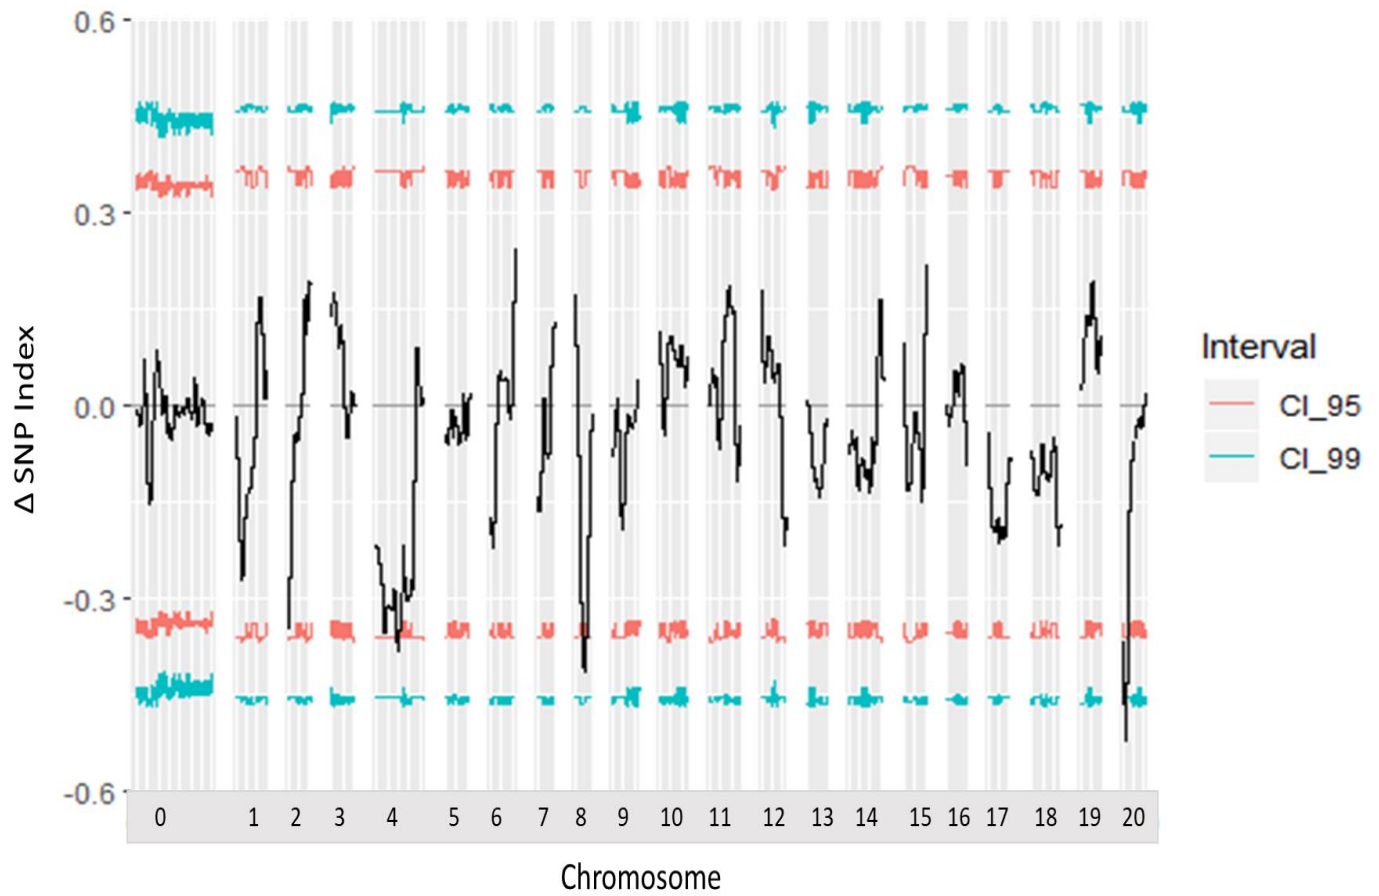

Figure S1: Quantitative trait loci (QTL) associated with Zucchini Yellow Mosaic Virus resistance in Nigerian Local accession (*Cucurbita moschata*) on chromosome 02, 04, 08 and 20 using Butterbush as consensus reference genome. Red and blue lines represent 95 and 99 % confidence interval (CI) respectively. Peaks on or above 95 % CI potentially harbor QTLs associated with ZYMV resistance.
