# Supplementary material for: Genetic Loci Associated with Resistance to Zucchini Yellow Mosaic Virus in Squash
Source: Plants (Basel). 2021 Sep 17;10(9):1935. doi: 10.3390/plants10091935 (PMC8465829; doi:10.3390/plants10091935)
Supplement: Supplementary file 1 [file plants-10-01935-s001.zip]

Archive with 4 entries (4 files):
- plants-1349697-Figure S1.pdf
- plants-1349697-Figure S2.pdf
- plants-1349697-Figure S3.pdf
- plants-1349697-supplementary.xlsx
