# Supplementary material for: Genetic Loci Associated with Resistance to Zucchini Yellow Mosaic Virus in Squash
Source: Plants (Basel). 2021 Sep 17;10(9):1935. doi: 10.3390/plants10091935 (PMC8465829; doi:10.3390/plants10091935)
Supplement: Supplementary file 1 [file plants-10-01935-s001.zip › plants-1349697-supplementary.xlsx]

## Sheet: Table S1-Markers assayed
Table S1: Information on twelve indel and fourteen SNP markers developed from the QTL regions near peak ∆ SNP’s, and genotyped in the parents and the resistant and susceptible bulks.
1 SNP and indel markers genotyped in the entire F2 population.
2 SNP and indel markers significantly linked with ZYMV resistance in F2 population
Chromosome	Marker	Sequence	Position (bp)
Chr20	Indel-1-F	TGCTACTTCCCTTTCACTACCA	1474648
	Indel-1-R	CCAGCTCCCTTATTTAGTTCACC	1474902
Chr201,2	Indel-2-F	GAAGGACACGTGGCGTTAAT	1482284
	Indel-2-R	TATTCACAAGGCGAGCAGAG	1482519
Chr08	Indel-3-F	TAGGGCTGTGTCAACCATGA	4501227
	Indel-3-R	CCTTCACCTTTTACAGGGACTC	4501478
Chr08	Indel-4-F	GTCCTACCGGGAGTTTGGAT	4501672
	Indel-4-R	GGTGTGCCCTTAAGATGATTTC	4501932
Chr08	Indel-5-F	TTTGTCTCCCACAAAAGGTG	4510702
	Indel-5-R	CTCGATCCATCATGGCATTT	4510949
Chr04	Indel-6-F	TGGTAAGCTCGTGAAAGGAAA	9583028
	Indel-6-R	TCTTTCGCATTCAATGTTTAGG	9583337
Chr04	Indel-7-F	GCAGAGGAAGCCAGATGAAG	9581678
	Indel-7-R	AGGATGAACCTCGCATCAAT	9581933
Chr04	Indel-8-F	TTTCTCTTGGTTCATATCACTTGG	9562931
	Indel-8-R	TGATCTCAGTGCATCGGATT	9563211
Chr02	Indel-9-F	TTGTCCTTCGAATATGACATGG	12601
	Indel-9-R	GCATGAACTTGATAGGTCCAAA	12852
Chr02	Indel-10-F	AGGCTCGGAAGGAGAGAGAA	12381
	Indel-10-R	TTCGAAGGACAACCACAAAA	12612
Chr02	Indel-11-F	AGGCTCGGAAGGAGAGAGAA	12381
	Indel-11-R	TTCGAAGGACAACCACAAAA	12612
Chr02	Indel-12-F	CCCATGAAATTGTTGAGGTG	15298
	Indel-12-R	GATGACAGACAAGTCGGGAAA	15546
Chr201,2	KASP-1-FAM	GAAGGTGACCAAGTTCATGCTTGCCACATAACTAGCCTTGTAAAC	1491656
	KASP-1-VIC	GAAGGTCGGAGTCAACGGATTTGCCACATAACTAGCCTTGTAAAT
	KASP-1-R	GGCCGACGATCTCTGTATGT
Chr20	KASP-2-FAM	GAAGGTGACCAAGTTCATGCTTTGCCACATAACTAGCCTTGTAAAC	1491656
	KASP-2-VIC	GAAGGTCGGAGTCAACGGATTTTGCCACATAACTAGCCTTGTAAAT
	KASP-2-R	TCATAACGATAGGCCGACGA
Chr201,2	KASP-3-FAM	GAAGGTGACCAAGTTCATGCTGCGCATGGTTCGCAGTTA	1486889
	KASP-3-VIC	GAAGGTCGGAGTCAACGGATTGCGCATGGTTCGCAGTTT
	KASP-3-R	CAGCTTCGCAATTGCTGCTA
Chr08	KASP-4-FAM	GAAGGTGACCAAGTTCATGCTCCAGCAGGACATGTGGAG	4504978
	KASP-4-VIC	GAAGGTCGGAGTCAACGGATTCCAGCAGGACATGTGGAA
	KASP-4-R	CCGCCTATCATTCACAGAGA
Chr081	KASP-5-FAM	GAAGGTGACCAAGTTCATGCTCCATGTGTATGTCAGTGAAGTCTACAA	4497218
	KASP-5-VIC	GAAGGTCGGAGTCAACGGATTCCATGTGTATGTCAGTGAAGTCTACAG
	KASP-5-R	GAGAATTACGACGGCCTGAA
Chr081,2	KASP-6-FAM	GAAGGTGACCAAGTTCATGCTCGGTTTGATAAGTGATGTTGAGTAAA	4497085
	KASP-6-VIC	GAAGGTCGGAGTCAACGGATTCGGTTTGATAAGTGATGTTGAGTAAC
	KASP-6-R	TCAATACAGGGAATGGAGTGC
Chr04	KASP-7-FAM	GAAGGTGACCAAGTTCATGCTTTTAACGCAATCTTTGGTGACTTG	9564363
	KASP-F-VIC	GAAGGTCGGAGTCAACGGATTTTTAACGCAATCTTTGGTGACTTT
	KASP-7-R	GTTGAGAATGGAGAGGCAAGG
Chr04	KASP-8-FAM	GAAGGTGACCAAGTTCATGCTGCAGTTTCCAATCAAAGCACAG	9563595
	KASP-8-VIC	GAAGGTCGGAGTCAACGGATTGCAGTTTCCAATCAAAGCACAT
	KASP-8-R	ATGTCCTGGGATGAACATGG
Chr04	KASP-9-FAM	GAAGGTGACCAAGTTCATGCTGGAAGAAGCTTATTGTTGGGTTTTA	9550632
	KASP-9-VIC	GAAGGTCGGAGTCAACGGATTGGAAGAAGCTTATTGTTGGGTTTTG
	KASP-9-R	CTGGGTTCCTCTGCTTTTCC
Chr041	KASP-10-FAM	GAAGGTGACCAAGTTCATGCTACATCTTCTTCCTTCATTCCATCA	9549004
	KASP-10-VIC	GAAGGTCGGAGTCAACGGATTACATCTTCTTCCTTCATTCCATCC
	KASP-10-R	TGGCACTGGCTAACTTGTTG
Chr02	KASP-11-FAM	GAAGGTGACCAAGTTCATGCTCCATTCAAAAGCTTACGTGATGTA	19547
	KASP-11-VIC	GAAGGTCGGAGTCAACGGATTCCATTCAAAAGCTTACGTGATGTG
	KASP-11-R	GGCATTTCGAACACTGCTTT
Chr02	KASP-12-FAM	GAAGGTGACCAAGTTCATGCTATCCGTATCGCTTAGCTTGGAC	19116
	KASP-12-VIC	GAAGGTCGGAGTCAACGGATTATCCGTATCGCTTAGCTTGGAT
	KASP-12-R	CAGGGGAGTAGTGCTTCCTGA
Chr02	KASP-13-FAM	GAAGGTGACCAAGTTCATGCTATCCTCTTCGATTCCTTCATCC	17254
	KASP-13-VIC	GAAGGTCGGAGTCAACGGATTATCCTCTTCGATTCCTTCATCT
	KASP-13-R	TTTGGAAAGACGTTCCCTTG
Chr021	KASP-14-FAM	GAAGGTGACCAAGTTCATGCTATCCGCATCCTCTTCGATTC	17246
	KASP-14-VIC	GAAGGTCGGAGTCAACGGATTATCCGCATCCTCTTCGATTG
	KASP-14-R	TGGAAAGACGTTCCCTTGAA

## Sheet: Table S2
Table S2: Result of Kruskal-Wallis test performed using KASP-1, KASP-3 and KASP-6 on BC1 population.
Chromosome	Marker	Genomic location (bp)	Kruskal-Wallis P-value
20	KASP-1	1491656	0.016*
20	KASP-3	1486889	0.0001*
8	KASP-6	4497085	0.021*
*Significant association of marker with ZYMV resistance (p < 0.05).

## Sheet: Table S3
Table S3: Information on chromosomal location and putative function of the resistant gene homologs identified within the QTL regions.
Chromosomal location	Gene ID	Protein Family	Annotation
Cmo_Chr20	CmoCh20G003040.1	Kinase family protein	IPR011016 (Zinc finger, RING-CH-type), IPR013083 (Zinc finger, RING/FYVE/PHD-type), IPR015916 (Galactose oxidase, beta-propeller), IPR020636 (Calcium/calmodulin-dependent/calcium-dependent protein kinase)	GO:0004683 (calmodulin-dependent protein kinase activity), GO:0005515 (protein binding), GO:0005524 (ATP binding), GO:0006468 (protein phosphorylation), GO:0008270 (zinc ion binding), GO:0009069 (serine family amino acid metabolic process)
Cmo_Chr20	CmoCh20G005690.1	(Serine/threonine kinase 23)	IPR011009 (Protein kinase-like domain)	GO:0004674 (protein serine/threonine kinase activity), GO:0004712 (protein serine/threonine/tyrosine kinase activity), GO:0005524 (ATP binding), GO:0006468 (protein phosphorylation), GO:0006979 (response to oxidative stress), GO:0009069 (serine family amino acid metabolic process)
Cmo_Chr20	CmoCh20G005960.1	Serine/threonine-protein kinase
Cmo_Chr20	CmoCh20G005970.1	receptor kinase 3	IPR000858 (S-locus glycoprotein), IPR001480 (Bulb-type lectin domain), IPR003609 (Apple-like), IPR011009 (Protein kinase-like domain), IPR013320 (Concanavalin A-like lectin/glucanase domain)	GO:0004672 (protein kinase activity), GO:0005524 (ATP binding), GO:0006468 (protein phosphorylation), GO:0048544 (recognition of pollen)
Cmo_Chr20	CmoCh20G006340.1	Disease resistance-responsive (Dirigent-like protein) family protein	IPR004265 (Plant disease resistance response protein)
Cmo_Chr20	CmoCh20G006820.1	Probable protein kinase UbiB	IPR008700 (Pathogenic type III effector avirulence factor Avr cleavage site), IPR009072 (Histone-fold), IPR011009 (Protein kinase-like domain)	GO:0005634 (nucleus), GO:0016301 (kinase activity), GO:0016310 (phosphorylation), GO:0043565 (sequence-specific DNA binding), GO:0046982 (protein heterodimerization activity)
Cmo_Chr20	CmoCh20G007220.1	protein serine/threonine kinases;protein kinases;ATP binding;sugar binding;kinases;carbohydrate binding	IPR011009 (Protein kinase-like domain), IPR011990 (Tetratricopeptide-like helical domain)	GO:0004674 (protein serine/threonine kinase activity), GO:0005515 (protein binding), GO:0005524 (ATP binding), GO:0005773 (vacuole), GO:0005886 (plasma membrane), GO:0006468 (protein phosphorylation), GO:0006499 (N-terminal protein myristoylation), GO:0009069 (serine family amino acid metabolic process), GO:0009506 (plasmodesma), GO:0009737 (response to abscisic acid), GO:0009742 (brassinosteroid…
Cmo_Chr20	CmoCh20G007370.1	Serine/threonine protein phosphatase 2C	IPR001932 (Protein phosphatase 2C (PP2C)-like domain), IPR015655 (Protein phosphatase 2C)	GO:0004722 (protein serine/threonine phosphatase activity), GO:0006470 (protein dephosphorylation), GO:0008287 (protein serine/threonine phosphatase complex), GO:0046872 (metal ion binding)
Cmo_Chr20	CmoCh20G008560.1	Adenine nucleotide alpha hydrolases-like superfamily protein	IPR006015 (Universal stress protein A)	GO:0002238 (response to molecule of fungal origin), GO:0005737 (cytoplasm), GO:0005886 (plasma membrane), GO:0009269 (response to desiccation), GO:0016036 (cellular response to phosphate starvation), GO:0016787 (hydrolase activity), GO:0019375 (galactolipid biosynthetic process), GO:0042631 (cellular response to water deprivation)
Cmo_Chr20	CmoCh20G008620.1	Receptor protein kinase-like protein	IPR001611 (Leucine-rich repeat), IPR003591 (Leucine-rich repeat, typical subtype), IPR011009 (Protein kinase-like domain), IPR013320 (Concanavalin A-like lectin/glucanase domain)	GO:0004672 (protein kinase activity), GO:0005515 (protein binding), GO:0005524 (ATP binding), GO:0006468 (protein phosphorylation), GO:0016020 (membrane), GO:0016491 (oxidoreductase activity)
Cmo_Chr20	CmoCh20G008660.1	protein serine/threonine kinases;protein kinases;ATP binding;sugar binding;kinases;carbohydrate binding	IPR011009 (Protein kinase-like domain)	GO:0004674 (protein serine/threonine kinase activity), GO:0005524 (ATP binding), GO:0005886 (plasma membrane), GO:0009069 (serine family amino acid metabolic process), GO:0009536 (plastid), GO:0009827 (plant-type cell wall modification), GO:0009860 (pollen tube growth), GO:0046777 (protein autophosphorylation), GO:0051510 (regulation of unidimensional cell growth), GO:0090406 (pollen tube)
Cmo_Chr20	CmoCh20G009450.1	Disease resistance protein	IPR002182 (NB-ARC), IPR027417 (P-loop containing nucleoside triphosphate hydrolase)	GO:0043531 (ADP binding)
Cmo_Chr20	CmoCh20G009460.1	Disease resistance protein	IPR002182 (NB-ARC), IPR027417 (P-loop containing nucleoside triphosphate hydrolase)	GO:0043531 (ADP binding)
Cmo_Chr20	CmoCh20G009480.1	Leucine-rich repeat family protein	IPR013210 (Leucine-rich repeat-containing N-terminal, type 2)	GO:0005618 (cell wall), GO:0005886 (plasma membrane), GO:0006952 (defense response), GO:0007165 (signal transduction), GO:0009506 (plasmodesma), GO:0009507 (chloroplast), GO:0048046 (apoplast)
Cmo_Chr20	CmoCh20G009490.1	Disease resistance protein	IPR002182 (NB-ARC), IPR027417 (P-loop containing nucleoside triphosphate hydrolase)	GO:0043531 (ADP binding)
Cmo_Chr20	CmoCh20G009810.1	receptor-like kinase	IPR001611 (Leucine-rich repeat), IPR011009 (Protein kinase-like domain), IPR013210 (Leucine-rich repeat-containing N-terminal, type 2)	GO:0004672 (protein kinase activity), GO:0005515 (protein binding), GO:0005524 (ATP binding), GO:0006468 (protein phosphorylation), GO:0016020 (membrane), GO:0016491 (oxidoreductase activity)
Cmo_Chr04	CmoCh04G019690.1	Receptor-like protein kinase, putative	IPR011009 (Protein kinase-like domain), IPR013320 (Concanavalin A-like lectin/glucanase domain), IPR024788 (Malectin-like carbohydrate-binding domain)	GO:0004672 (protein kinase activity), GO:0005524 (ATP binding), GO:0006468 (protein phosphorylation)
Cmo_Chr04	CmoCh04G019510.1	(Receptor protein kinase, putative)	IPR011009 (Protein kinase-like domain), IPR013320 (Concanavalin A-like lectin/glucanase domain)	GO:0004672 (protein kinase activity), GO:0005524 (ATP binding), GO:0006468 (protein phosphorylation)
Cmo_Chr04	CmoCh04G019500.1	Ubiquitin-like domain-containing CTD phosphatase	IPR004274 (NLI interacting factor), IPR023214 (HAD-like domain), IPR029071 (Ubiquitin-related domain)	GO:0004721 (phosphoprotein phosphatase activity), GO:0005515 (protein binding), GO:0005634 (nucleus), GO:0006470 (protein dephosphorylation)
Cmo_Chr04	CmoCh04G019220.1	Leucine-rich repeat receptor-like serine/threonine-protein kinase	IPR001611 (Leucine-rich repeat), IPR011009 (Protein kinase-like domain), IPR013210 (Leucine-rich repeat-containing N-terminal, type 2)	GO:0004674 (protein serine/threonine kinase activity), GO:0005515 (protein binding), GO:0005524 (ATP binding), GO:0005886 (plasma membrane), GO:0006468 (protein phosphorylation), GO:0009069 (serine family amino acid metabolic process), GO:0016021 (integral component of membrane), GO:0016491 (oxidoreductase activity), GO:0055114 (oxidation-reduction process)
Cmo_Chr04	CmoCh04G019020.1	Leucine-rich repeat-containing protein DDB_G0290503	Putative isoform 2 LRR
Cmo_Chr04	CmoCh04G019030.1	Senescence-induced receptor-like serine/threonine-protein kinase	IPR001611 (Leucine-rich repeat), IPR011009 (Protein kinase-like domain), IPR013083 (Zinc finger, RING/FYVE/PHD-type), IPR013320 (Concanavalin A-like lectin/glucanase domain), IPR024788 (Malectin-like carbohydrate-binding domain)	GO:0004674 (protein serine/threonine kinase activity), GO:0005515 (protein binding), GO:0005524 (ATP binding), GO:0006468 (protein phosphorylation), GO:0007267 (cell-cell signaling), GO:0008270 (zinc ion binding), GO:0009069 (serine family amino acid metabolic process), GO:0009616 (virus induced gene silencing), GO:0010267 (production of ta-siRNAs involved in RNA interference), GO:0016021 (integr…
Cmo_Chr04	CmoCh04G018600.1	Plant intracellular ras group-related LRR 3, putative	IPR001611 (Leucine-rich repeat)	GO:0005515 (protein binding), GO:0008152 (metabolic process), GO:0016787 (hydrolase activity)
Cmo_Chr08	CmoCh08G005660.1	Receptor kinase	IPR001611 (Leucine-rich repeat), IPR003591 (Leucine-rich repeat, typical subtype), IPR011009 (Protein kinase-like domain), IPR013210 (Leucine-rich repeat-containing N-terminal, type 2), IPR013320 (Concanavalin A-like lectin/glucanase domain), IPR025875 (Leucine rich repeat 4)	GO:0004674 (protein serine/threonine kinase activity), GO:0005515 (protein binding), GO:0005524 (ATP binding), GO:0006468 (protein phosphorylation), GO:0009069 (serine family amino acid metabolic process), GO:0016021 (integral component of membrane), GO:0032440 (2-alkenal reductase [NAD(P)] activity), GO:0055114 (oxidation-reduction process)
Cmo_Chr08	CmoCh08G005790.1	Serine/threonine protein phosphatase	IPR001932 (Protein phosphatase 2C (PP2C)-like domain), IPR015655 (Protein phosphatase 2C)	GO:0004722 (protein serine/threonine phosphatase activity), GO:0006470 (protein dephosphorylation), GO:0008287 (protein serine/threonine phosphatase complex), GO:0046872 (metal ion binding)
Cmo_Chr08	CmoCh08G005890.1	Receptor-like serine/threonine-protein kinase	IPR011009 (Protein kinase-like domain), IPR013320 (Concanavalin A-like lectin/glucanase domain)	GO:0000186 (activation of MAPKK activity), GO:0004709 (MAP kinase kinase kinase activity), GO:0005524 (ATP binding), GO:0005886 (plasma membrane), GO:0007178 (transmembrane receptor protein serine/threonine kinase signaling pathway), GO:0009069 (serine family amino acid metabolic process), GO:0016021 (integral component of membrane)
Cmo_Chr08	CmoCh08G005930.1	F-box/LRR-repeat protein 14	IPR006553 (Leucine-rich repeat, cysteine-containing subtype)
Cmo_Chr08	CmoCh08G005990.1	F-box/LRR-repeat protein 14	IPR006553 (Leucine-rich repeat, cysteine-containing subtype), IPR025875 (Leucine rich repeat 4)
Cmo_Chr08	CmoCh08G006100.1	Receptor-like serine/threonine-protein kinase	IPR011009 (Protein kinase-like domain), IPR013320 (Concanavalin A-like lectin/glucanase domain), IPR018545 (Btz domain), IPR024788 (Malectin-like carbohydrate-binding domain)	GO:0004674 (protein serine/threonine kinase activity), GO:0004715 (non-membrane spanning protein tyrosine kinase activity), GO:0005524 (ATP binding), GO:0009069 (serine family amino acid metabolic process), GO:0018108 (peptidyl-tyrosine phosphorylation)
Cmo_Chr08	CmoCh08G006310.1	(Receptor protein kinase, putative)	IPR001480 (Bulb-type lectin domain), IPR011009 (Protein kinase-like domain), IPR013227 (PAN domain), IPR013320 (Concanavalin A-like lectin/glucanase domain)	GO:0004672 (protein kinase activity), GO:0005524 (ATP binding), GO:0006468 (protein phosphorylation)
Cmo_Chr08	CmoCh08G007140.1	Receptor protein kinase, putative	IPR001611 (Leucine-rich repeat), IPR024788 (Malectin-like carbohydrate-binding domain), IPR025875 (Leucine rich repeat 4)	GO:0005515 (protein binding)
Cmo_Chr08	CmoCh08G007150.1	Receptor protein kinase, putative	IPR011009 (Protein kinase-like domain), IPR013320 (Concanavalin A-like lectin/glucanase domain), IPR024788 (Malectin-like carbohydrate-binding domain), IPR025875 (Leucine rich repeat 4)	GO:0004672 (protein kinase activity), GO:0005524 (ATP binding), GO:0006468 (protein phosphorylation)
Cmo_Chr08	CmoCh08G007170.1	Receptor protein kinase, putative	IPR001611 (Leucine-rich repeat), IPR003591 (Leucine-rich repeat, typical subtype), IPR011009 (Protein kinase-like domain), IPR013320 (Concanavalin A-like lectin/glucanase domain), IPR024788 (Malectin-like carbohydrate-binding domain), IPR025875 (Leucine rich repeat 4)	GO:0004672 (protein kinase activity), GO:0005515 (protein binding), GO:0005524 (ATP binding), GO:0006468 (protein phosphorylation)
Cmo_Chr08	CmoCh08G007260.1	Serine/threonine-protein phosphatase 2A 55 kDa regulatory subunit B	IPR000009 (Protein phosphatase 2A, regulatory subunit PR55), IPR015943 (WD40/YVTN repeat-like-containing domain)	GO:0000159 (protein phosphatase type 2A complex), GO:0005515 (protein binding), GO:0007165 (signal transduction), GO:0008601 (protein phosphatase type 2A regulator activity), GO:0050790 (regulation of catalytic activity)
Cmo_Chr08	CmoCh08G007400.1	Receptor-like serine/threonine-protein kinase	IPR004883 (Lateral organ boundaries, LOB), IPR011009 (Protein kinase-like domain), IPR013320 (Concanavalin A-like lectin/glucanase domain)	GO:0004674 (protein serine/threonine kinase activity), GO:0005524 (ATP binding), GO:0006468 (protein phosphorylation), GO:0009069 (serine family amino acid metabolic process)
Cmo_Chr08	CmoCh08G007720.1	(Receptor serine-threonine protein kinase, putative) (2.7.10.2)	IPR011009 (Protein kinase-like domain), IPR013320 (Concanavalin A-like lectin/glucanase domain)	GO:0004674 (protein serine/threonine kinase activity), GO:0004715 (non-membrane spanning protein tyrosine kinase activity), GO:0005515 (protein binding), GO:0005524 (ATP binding), GO:0009069 (serine family amino acid metabolic process), GO:0018108 (peptidyl-tyrosine phosphorylation)
Cmo_Chr08	CmoCh08G008440.1	Receptor-like serine/threonine-protein kinase	IPR001611 (Leucine-rich repeat), IPR003591 (Leucine-rich repeat, typical subtype), IPR011009 (Protein kinase-like domain), IPR013210 (Leucine-rich repeat-containing N-terminal, type 2), IPR013320 (Concanavalin A-like lectin/glucanase domain), IPR025875 (Leucine rich repeat 4)	GO:0004674 (protein serine/threonine kinase activity), GO:0005515 (protein binding), GO:0005524 (ATP binding), GO:0005794 (Golgi apparatus), GO:0005886 (plasma membrane), GO:0006468 (protein phosphorylation), GO:0009069 (serine family amino acid metabolic process), GO:0009506 (plasmodesma), GO:0016021 (integral component of membrane)

## Sheet: Figure S1
Figure S1: Quantitative trait loci (QTL) associated with Zucchini Yellow Mosaic Virus resistance in Nigerian Local accession (Cucurbita moschata ) on chromosome 02, 04, 08 and 20 using Butterbush as consensus reference genome. Red and blue lines represent 95 and 99 % confidence interval (CI) respectively. Peaks on or above 95 % CI potentially harbor QTLs associated with ZYMV resistance.

## Sheet: Figure S2
Figure S2: Quantitative trait loci associated with ZYMV resistance in C. moschata identified on chromosome (chr) 02, 04, 08 and 20 using Butterbush as the parental consensus reference genome. Black line represents tricube smoothed G’ value for each SNP. Red line denotes genome wide false discovery rate (FDR) of 0.01. Peaks above 0.01 FDR line potentially harbor QTLs associated with ZYMV resistanc…

## Sheet: Figure S3
Figure S3: (a) An agarose gel showing a 245 bp fragment amplified with Indel-2 marker in resistant individuals, but absent in susceptible individuals. (b) Marker assay with KASP-1 (SNP) in a subset of F2 individuals segregating for resistance to ZYMV. Green triangles represent resistant individuals carrying the resistance allele, blue triangles represent susceptible individuals carrying the alter…
